# Supplementary material
Source: publisher figshare collection journal article supplement (https://acs.figshare.com/ndownloader/files/22799984)
Supplement: Supplementary file 1 [file 22799984]

## Supporting Information

# Supramolecular additive initiated controlled atom transfer radical polymerization of zwitterionic polymers on ureido-pyrimidinone-based biomaterial surfaces

Bastiaan D. Ippel <sup>‡ 1,2</sup>, Muhabbat I. Komil <sup>‡ 1,3</sup>, Paul A.A. Bartels<sup>1,3</sup>, Serge H.M. Söntjens<sup>4</sup>, Roy J.E.A.

Boonen<sup>1,3</sup>, Maarten M.J. Smulders<sup>5</sup>, Patricia Y.W. Dankers<sup>1,2,3,\*</sup>

- 1) Institute for Complex Molecular Systems, Eindhoven University of Technology, PO Box 513, 5600 MB Eindhoven, The Netherlands
- 2) Laboratory for Cell and Tissue Engineering, Department of Biomedical Engineering, Eindhoven University of Technology, PO Box 513, 5600 MB Eindhoven, The Netherlands
- 3) Laboratory of Chemical Biology, Department of Biomedical Engineering, Eindhoven University of Technology, PO Box 513, 5600 MB Eindhoven, The Netherlands
- 4) SyMO-Chem BV, Eindhoven, Den Dolech 2, 5612 AZ, Eindhoven, The Netherlands
- 5) Laboratory of Organic Chemistry, Wageningen University, Stippenweg 4, 6708 WE Wageningen, The Netherlands

<sup>‡</sup> These authors contributed equally

\* Corresponding author

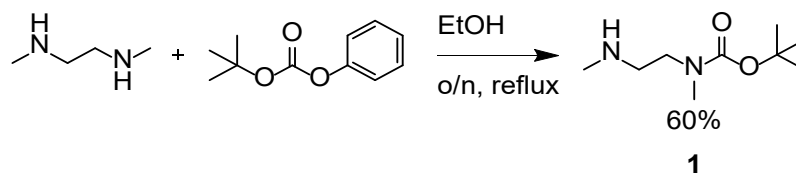

**Scheme S1:** Synthesis of tert-butyl methyl(2-(methylamino)ethyl)carbamate

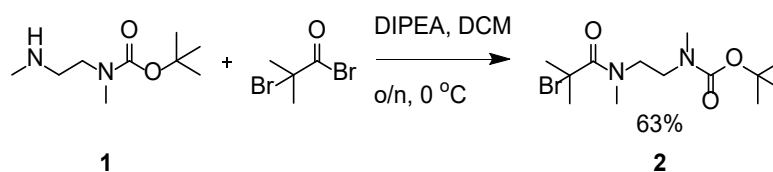

**Scheme S1:** Synthesis of tert-butyl (2-(2-bromo-N,2-dimethylpropanamido)ethyl)(methyl) carbamate

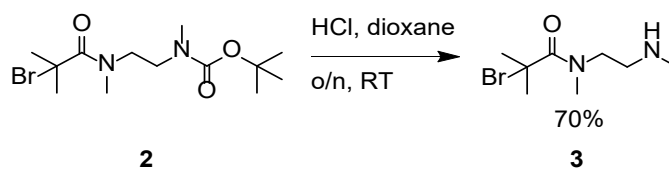

**Scheme S2:** Synthesis of 2-bromo-N,2-dimethyl-N-(2-(methylamino)ethyl)propanamide

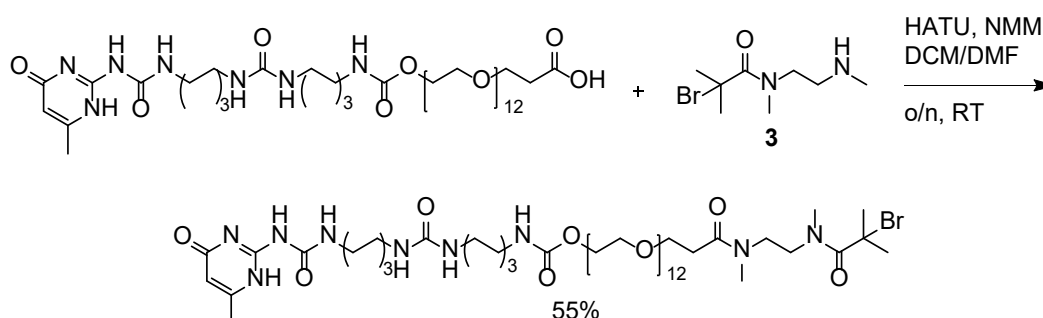

**Scheme S3:** Synthesis of UPy-BiB.

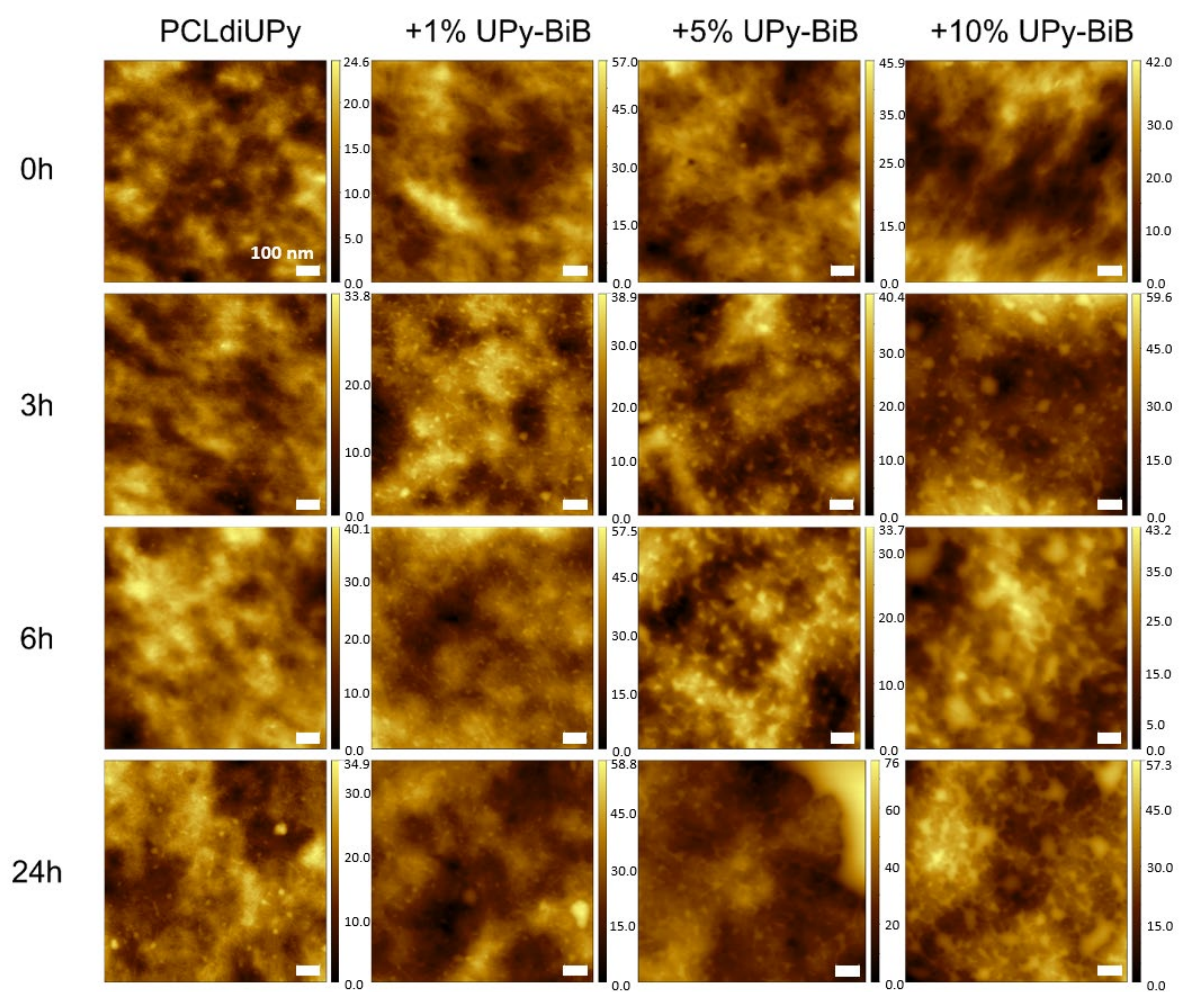

**Figure S1:** Atomic Force Microscopy height images recorded in tapping mode in air of solution-cast films of PCLdiUPy with 0, 1, 5, and 10% UPy-BiB additive before and after 3, 6, and 24 hours of polymerization on the surface. Scale bars represent 100 nm.

24h

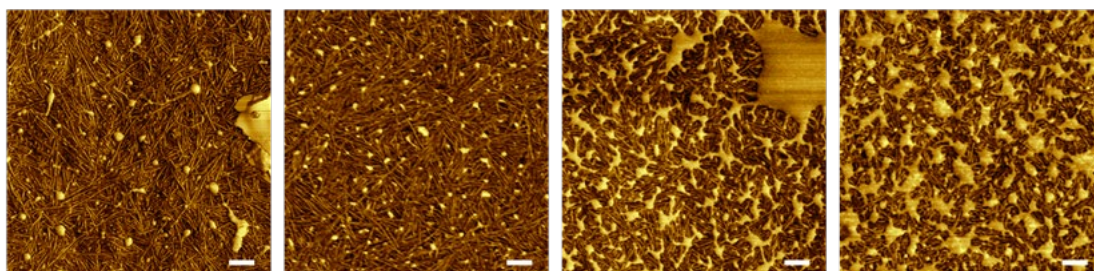

**Figure S2:** Atomic Force Microscopy phase images recorded in tapping mode in air of solution-cast films of PCLdiUPy with 0, 1, 5, and 10% UPy-BiB additive (from left to right) after 24 hours of reaction on the surface. Scale bars represent 100 nm.

**Table S1:** Fiber diameter as determined from AFM phase images, mean  $\pm$  SD.

|           | PCLdiUPy<br>[nm] | +1% UPy-BiB<br>[nm] | +5% UPy-BiB<br>[nm] | +10% UPy-BiB<br>[nm] |
|-----------|------------------|---------------------|---------------------|----------------------|
| <b>0h</b> | 7.3 $\pm$ 1.0    | 7.6 $\pm$ 1.2       | 7.7 $\pm$ 1.2       | 7.2 $\pm$ 1.1        |

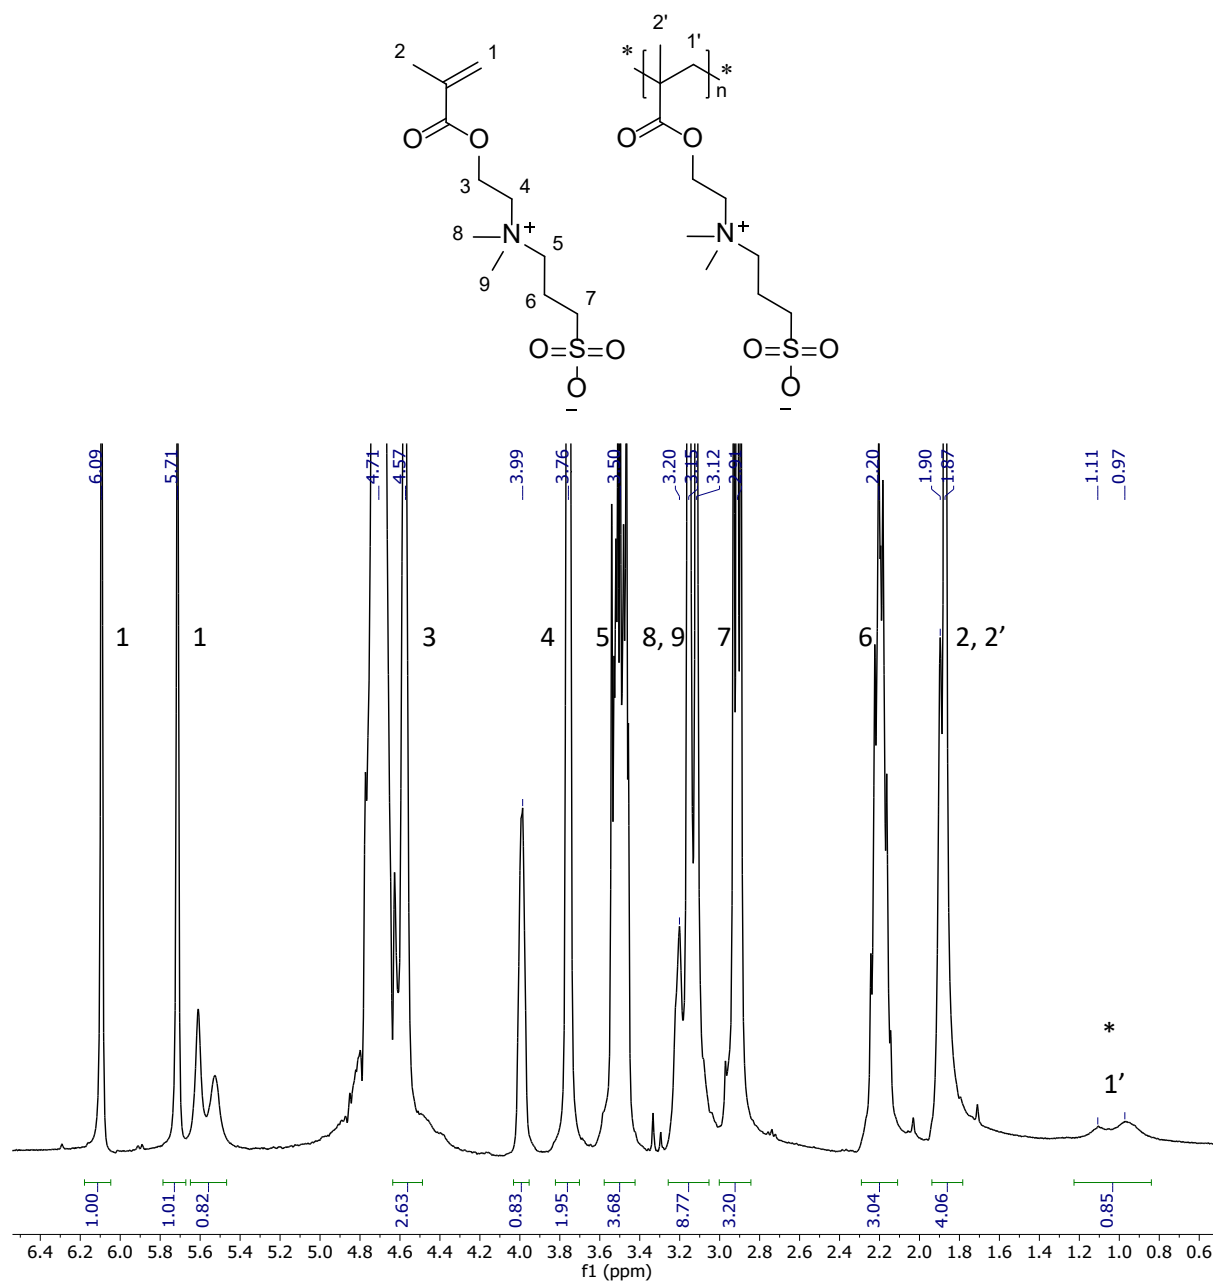

**Figure S3:**  $^1\text{H}$  NMR spectrum of the reaction mixture after 2 hours of polymerization, showing polymer backbones indicated with asterix (recorded in  $\text{D}_2\text{O}$ ).

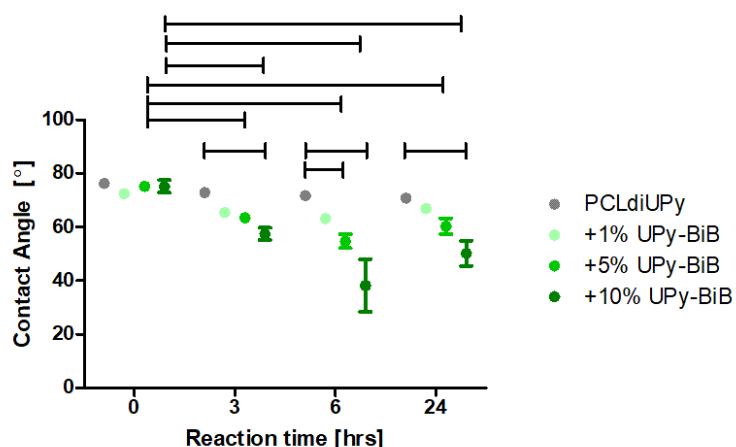

**Figure S4:** Water contact angles measured on solution-cast films with 0, 1, 5, and 10% UPy-BiB before and after 3, 6, and 24 hours of polymerization on the surface. Data are represented as mean  $\pm$  SD. Statistically significant differences are depicted by the overhead lines. Error bars are on the order of graph symbol size.

**Table S2:** Root Mean Square (RMS) roughness of solution-cast films.

|            | PCLdiUPy<br>[nm] | +1% UPy-BiB<br>[nm] | +5% UPy-BiB<br>[nm] | +10% UPy-BiB<br>[nm] |
|------------|------------------|---------------------|---------------------|----------------------|
| <b>0h</b>  | 4.6 $\pm$ 1.4    | 8.7 $\pm$ 0.8       | 6.3                 | 5.1 $\pm$ 0.1        |
| <b>3h</b>  | 4.5 $\pm$ 0.4    | 7.7 $\pm$ 2.3       | 7.5 $\pm$ 1.6       | 8.2 $\pm$ 0.8        |
| <b>6h</b>  | 5.6 $\pm$ 1.0    | 7.6 $\pm$ 0.4       | 6.0 $\pm$ 0.2       | 7.1 $\pm$ 0.2        |
| <b>24h</b> | 5.8 $\pm$ 0.5    | 7.2 $\pm$ 1.6       | 11.1 $\pm$ 1.5      | 7.5 $\pm$ 0.1        |

**Table S3:** Atomic surface composition of solution-cast films with 0, 1, 5, and 10 mol% UPy-BiB before and after exposure to the SI-ATRP reaction conditions for 3, 6, and 24 hour.

|                     |     | Surface composition [at%] |       |      |      |      |      |
|---------------------|-----|---------------------------|-------|------|------|------|------|
|                     |     | C                         | O     | N    | N+   | S    | Br   |
| <b>PCLdiUPy</b>     | 0h  | 74.45                     | 22.17 | 3.38 | 0.00 | 0.00 | 0.00 |
|                     | 3h  | 75.20                     | 20.67 | 4.00 | 0.08 | 0.03 | 0.00 |
|                     | 6h  | 76.64                     | 19.60 | 3.65 | 0.04 | 0.07 | 0.00 |
|                     | 24h | 75.36                     | 20.48 | 3.80 | 0.12 | 0.23 | 0.00 |
| <b>+1% UPy-BiB</b>  | 0h  | 74.72                     | 21.30 | 3.95 | 0.00 | 0.03 | 0.00 |
|                     | 3h  | 74.23                     | 21.36 | 3.65 | 0.24 | 0.48 | 0.04 |
|                     | 6h  | 74.93                     | 20.69 | 3.75 | 0.21 | 0.36 | 0.04 |
|                     | 24h | 74.81                     | 20.82 | 4.02 | 0.13 | 0.22 | 0.00 |
| <b>+5% UPy-BiB</b>  | 0h  | 73.81                     | 22.23 | 3.85 | 0.00 | 0.07 | 0.03 |
|                     | 3h  | 73.15                     | 22.21 | 3.41 | 0.41 | 0.69 | 0.11 |
|                     | 6h  | 74.87                     | 20.64 | 3.42 | 0.36 | 0.60 | 0.10 |
|                     | 24h | 73.48                     | 22.31 | 3.24 | 0.34 | 0.55 | 0.07 |
| <b>+10% UPy-BiB</b> | 0h  | 74.23                     | 21.16 | 4.46 | 0.00 | 0.07 | 0.08 |
|                     | 3h  | 71.38                     | 23.78 | 3.37 | 0.47 | 0.82 | 0.16 |
|                     | 6h  | 70.76                     | 23.66 | 2.97 | 0.82 | 1.58 | 0.22 |
|                     | 24h | 72.21                     | 22.23 | 3.23 | 0.84 | 1.37 | 0.12 |

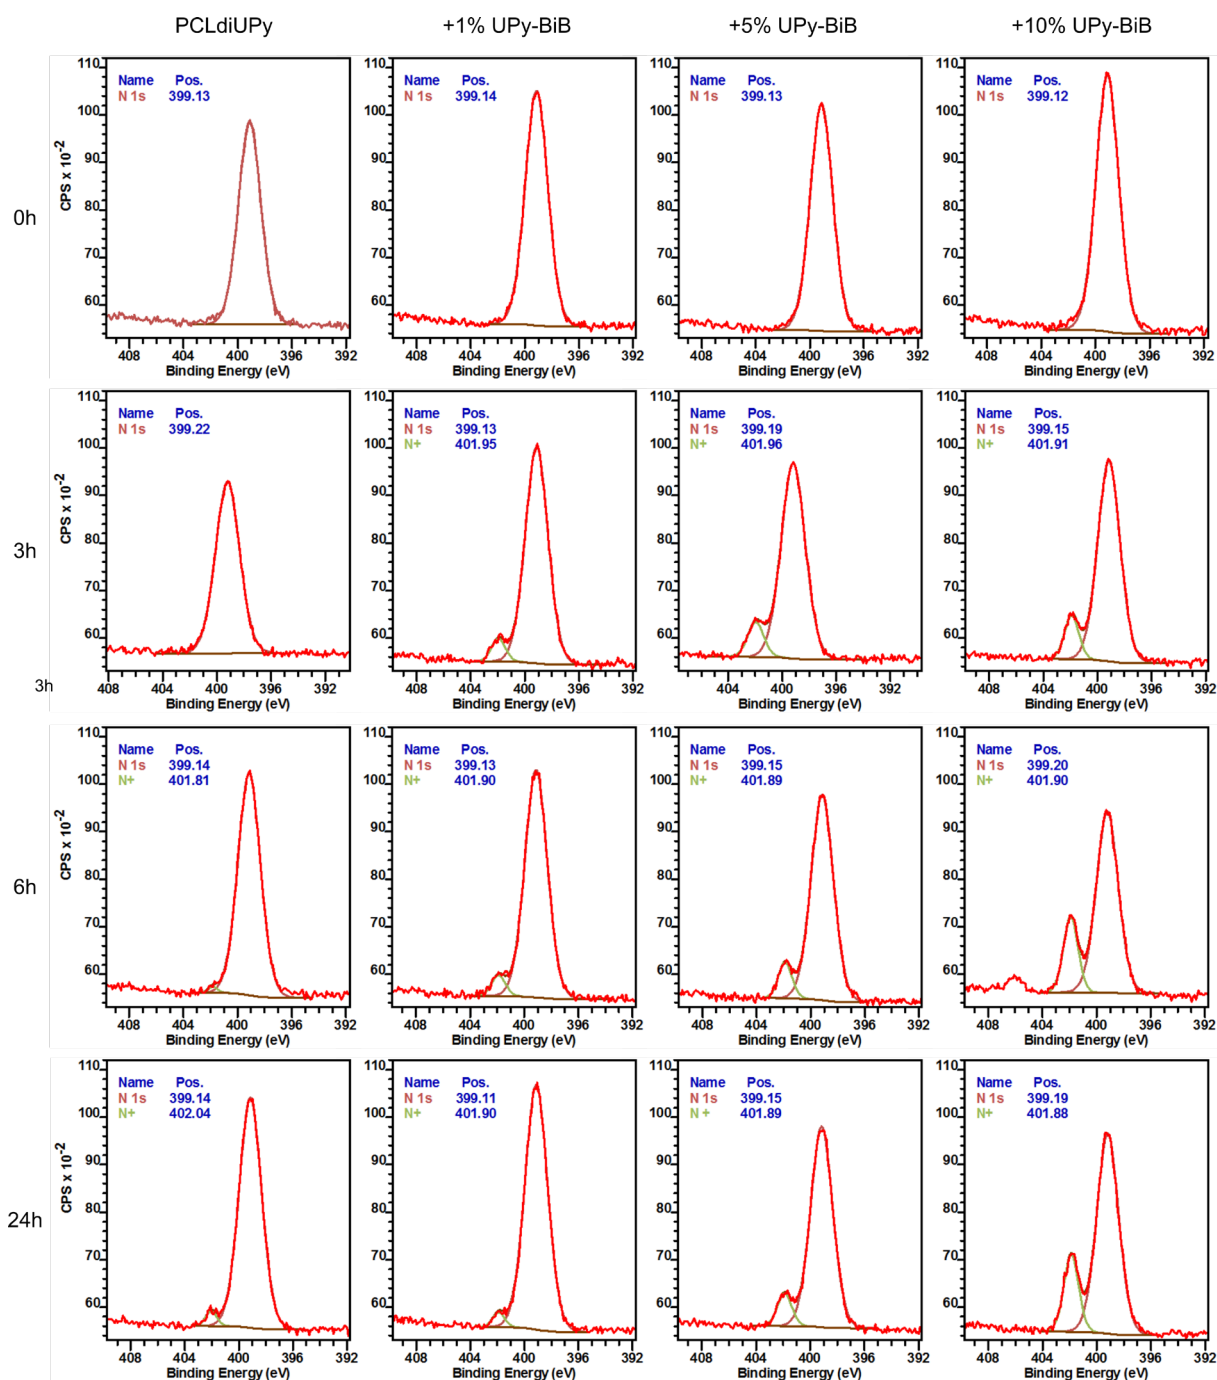

**Figure S5:** XPS N 1s narrow scan spectra of solution-cast films of PCLdiUPy with 0, 1, 5, and 10 mol% UPy-BiB additive before, and after 3, 6, and 24 hours polymerization reaction.

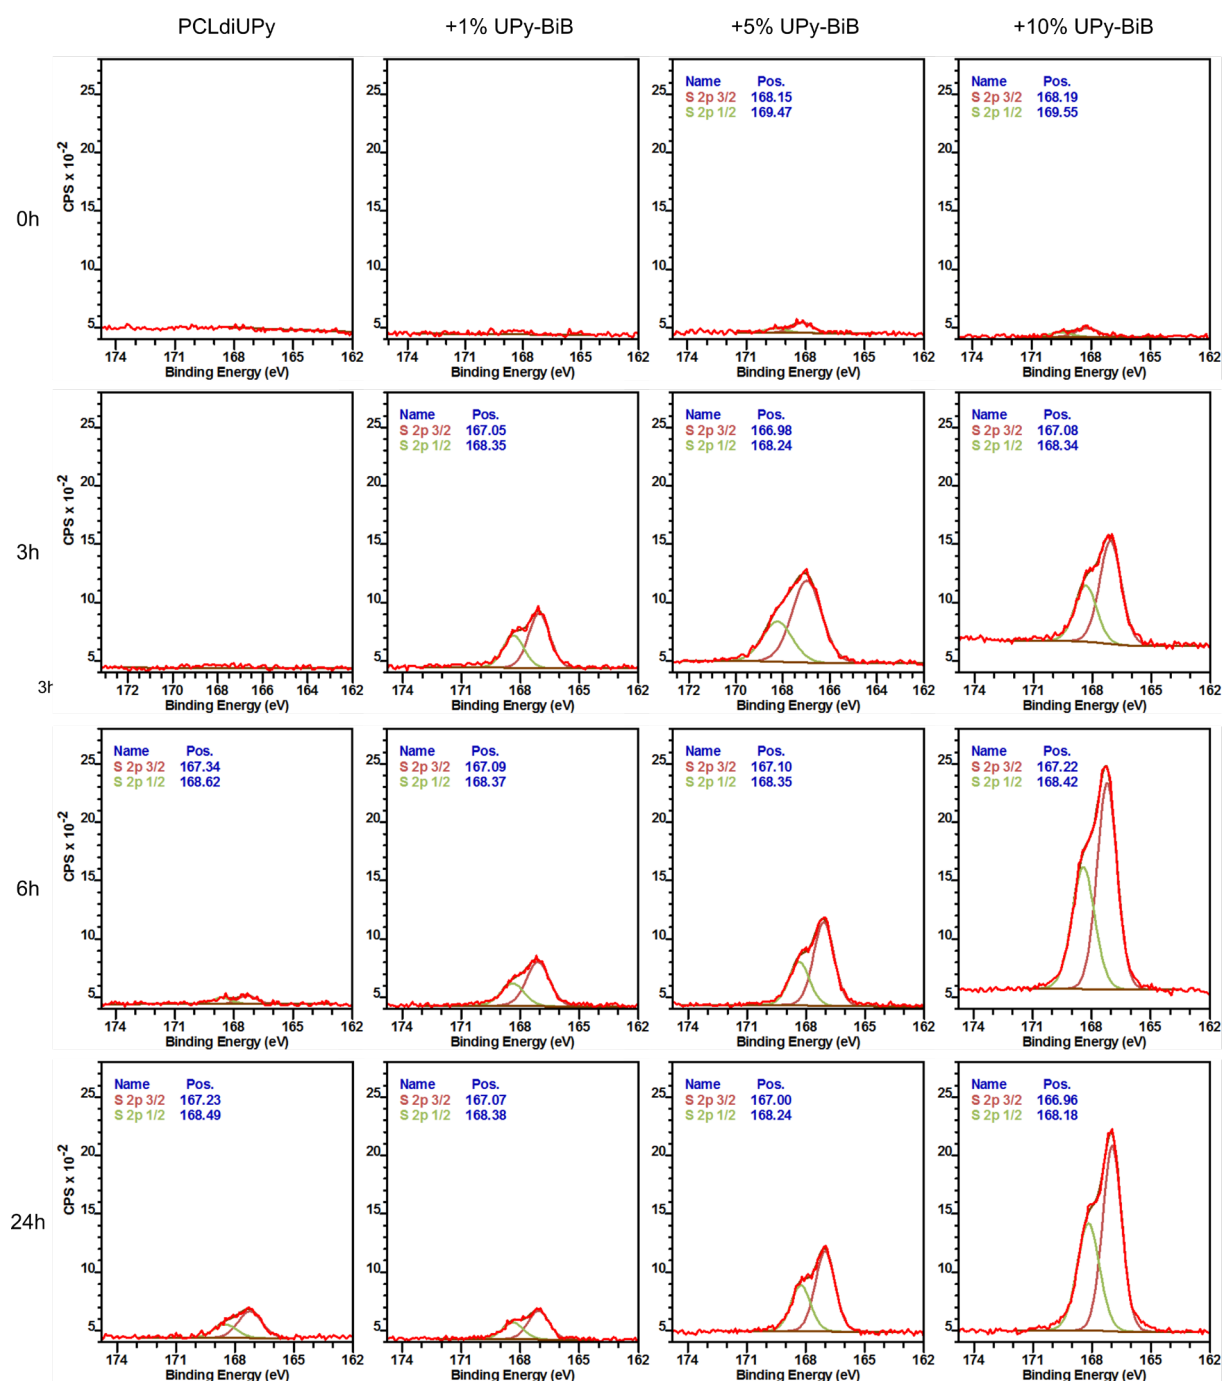

**Figure S6:** XPS S 2p narrow scan spectra of solution-cast films of PCLdiUPy with 0, 1, 5, and 10 mol% UPy-BiB additive before, and after 3, 6, and 24 hours polymerization reaction.



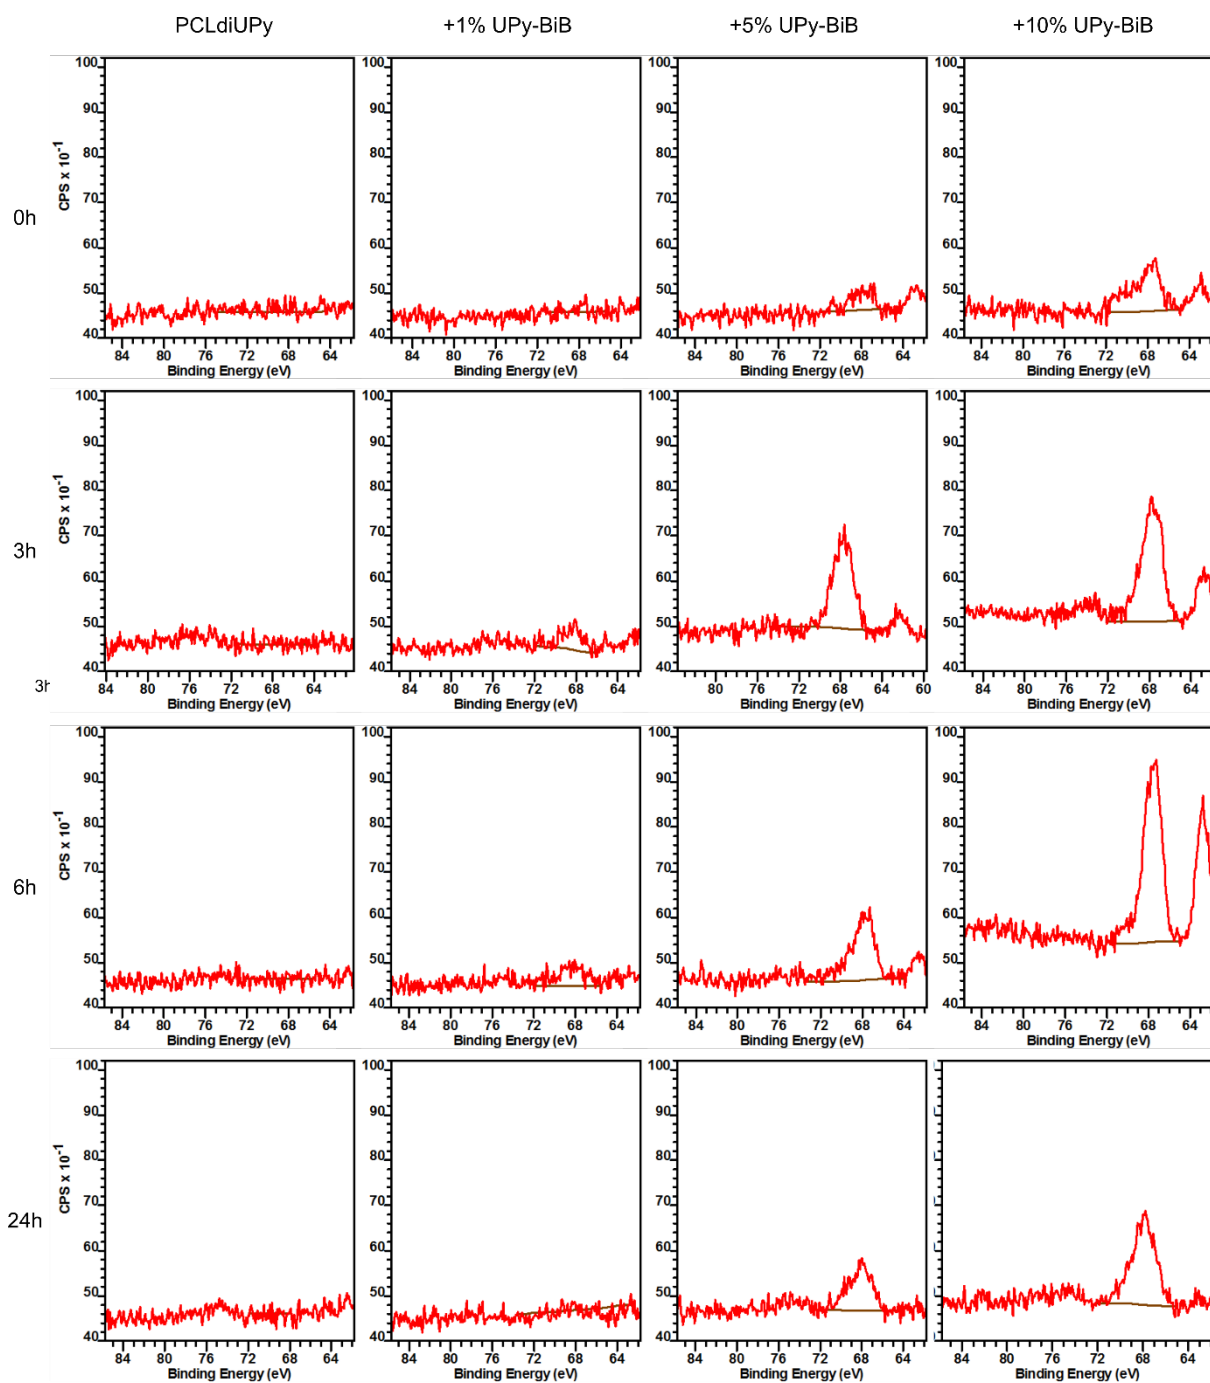

**Figure S7:** XPS Br 3d narrow scan spectra of solution-cast films of PCLdiUPy with 0, 1, 5, and 10 mol% UPy-BiB additive before, and after 3, 6, and 24 hours polymerization reaction.

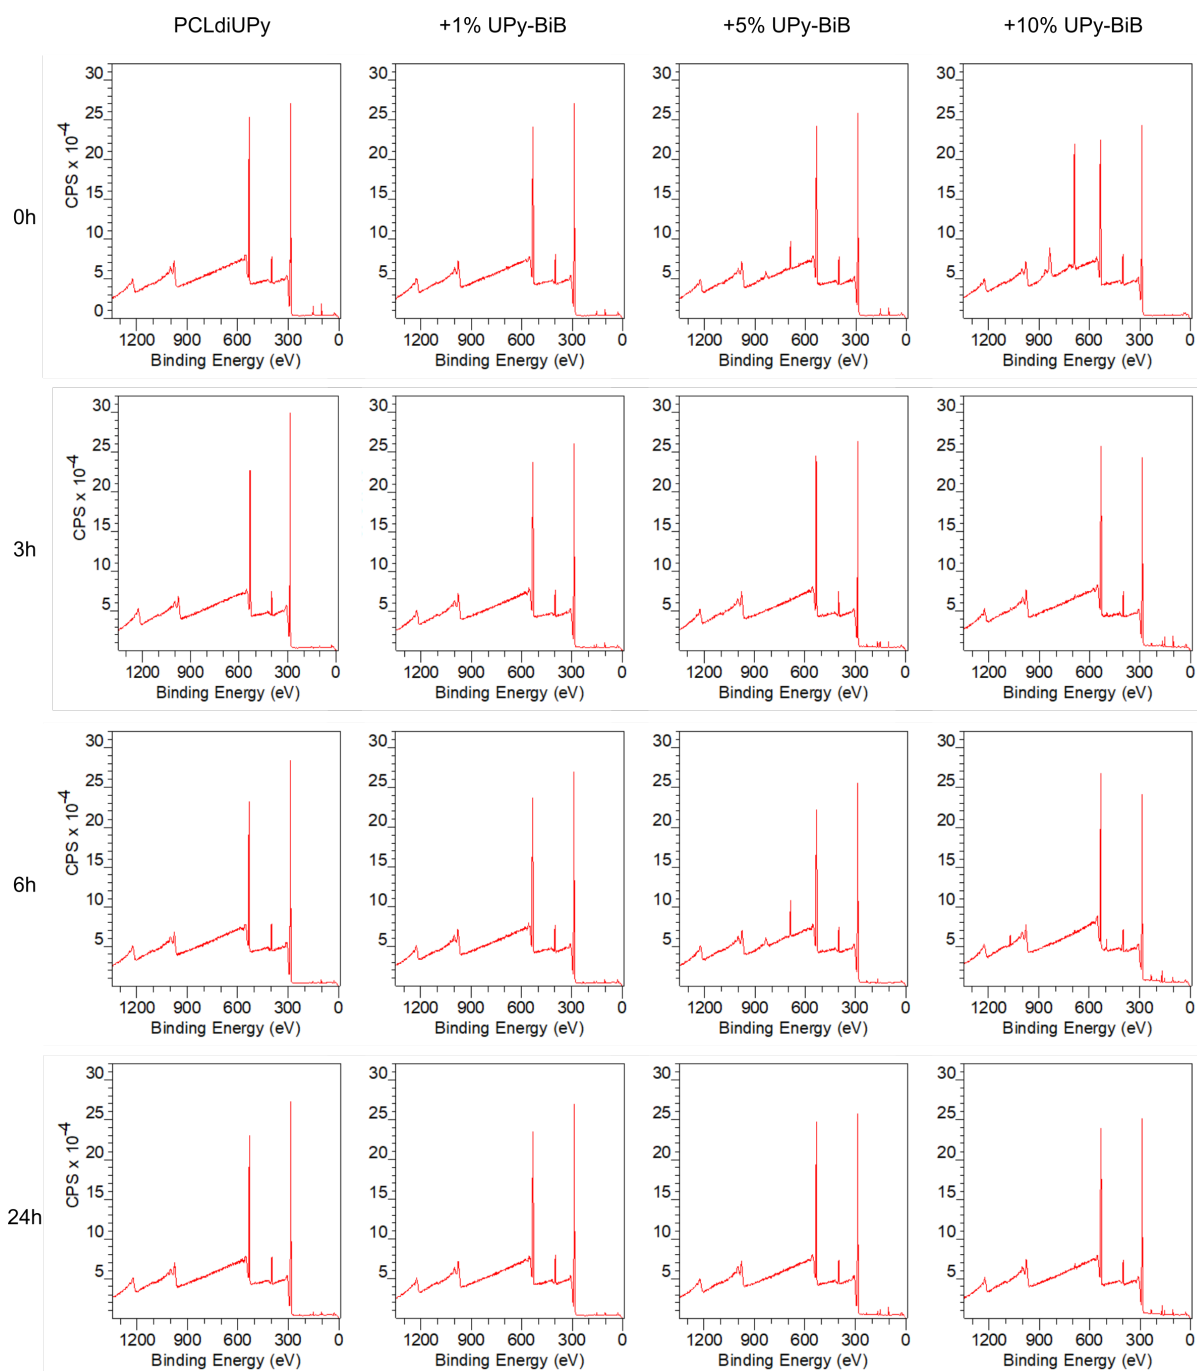

**Figure S8:** XPS survey spectra of solution-cast films of PCLdiUPy with 0, 1, 5, and 10 mol% UPy-BiB additive before, and after 3, 6, and 24 hours polymerization reaction.

**Table S4:** Surface composition of electrospun scaffolds

|                 | Surface composition [at %] |       |      |                |      |      |      |
|-----------------|----------------------------|-------|------|----------------|------|------|------|
|                 | C                          | O     | N    | N <sup>+</sup> | S    | Br   | Al   |
| PCLdiUPy 0h     | 75.16                      | 20.68 | 4.16 | 0.00           | 0.00 | 0.00 | 0.00 |
| PCLdiUPy 24h    | 65.63                      | 25.65 | 2.01 | 1.10           | 1.94 | 0.00 | 3.68 |
| 10% UPy-BiB 0h  | 74.59                      | 20.89 | 4.48 | 0.00           | 0.00 | 0.03 | 0.00 |
| 10% UPy-BiB 24h | 69.90                      | 23.82 | 2.88 | 0.71           | 1.18 | 0.09 | 1.42 |

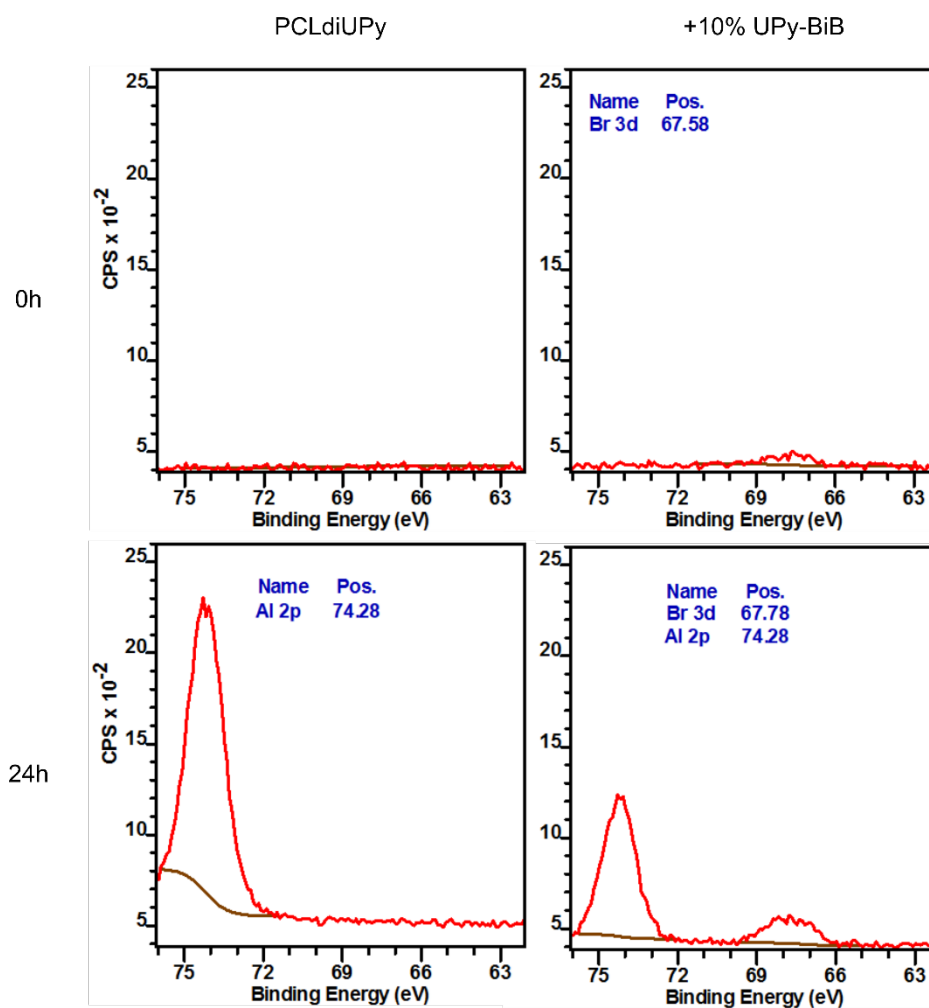**Figure S9:** XPS narrow scan spectra of the Br 3d and Cu 3p region of electrospun scaffolds of PCLdiUPy with 0 and 10% UPy-BiB before and after 24 hours polymerization reaction.

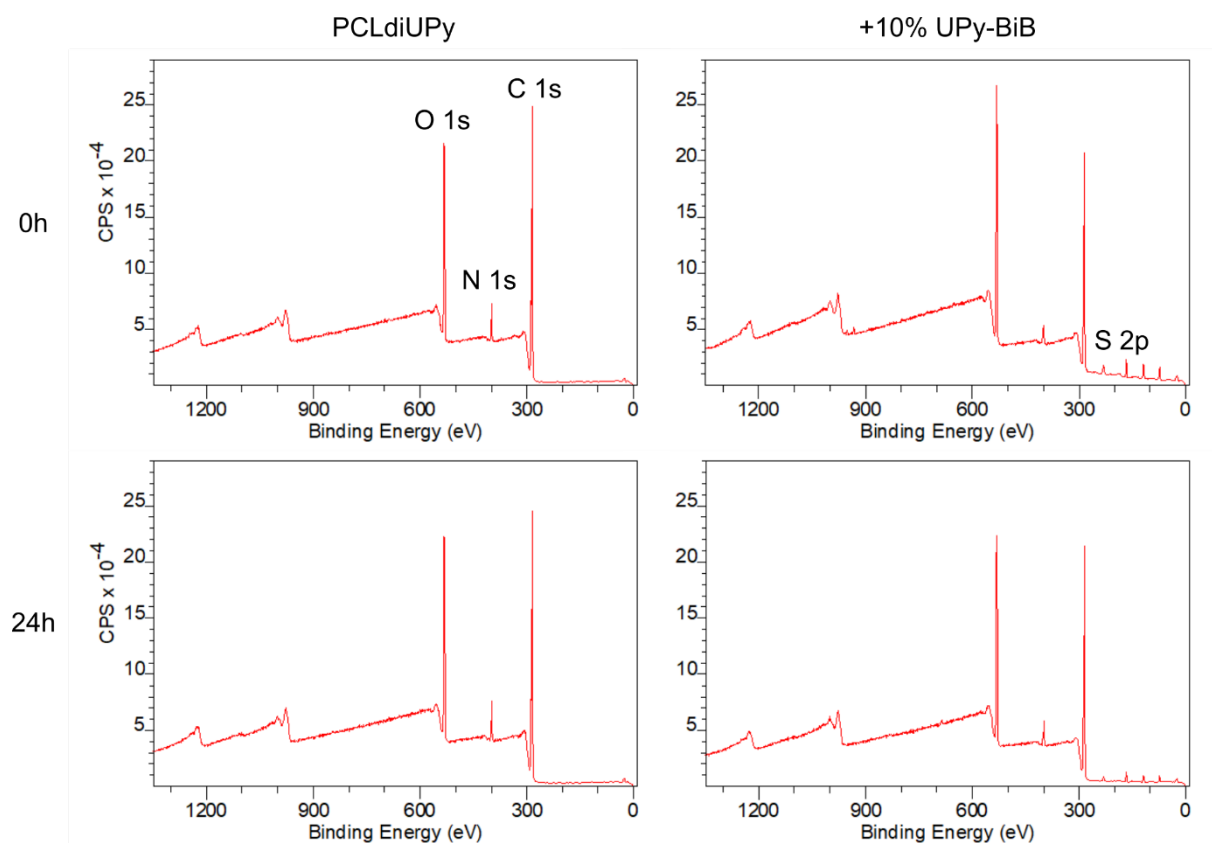

**Figure S10:** XPS survey scan spectra of electrospun scaffolds of PCLdiUPy with 0 and 10% UPy-BiB before and after 24 hours polymerization reaction.

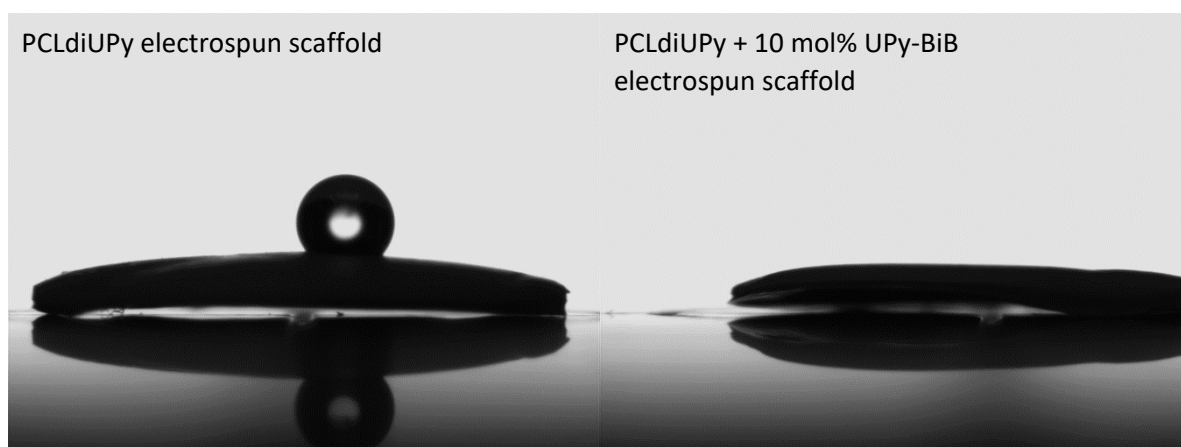

**Figure S11:** Contact angle of water droplets on PCLdiUPy electrospun scaffolds without additive (left) and with 10 mol% UPy-BiB additive (right) 30 seconds after droplet deposition (2  $\mu$ L).
